# Supplementary material for: Blood plasma surface-enhanced Raman spectroscopy for non-invasive optical detection of cervical cancer
Source: Royal Society of Chemistry journal article supplement (doi:10.1039/c3an36890d), 2013-01-01
Supplement: c3an36890d.pdf [file c3an36890d.pdf]

## Supplementary Information

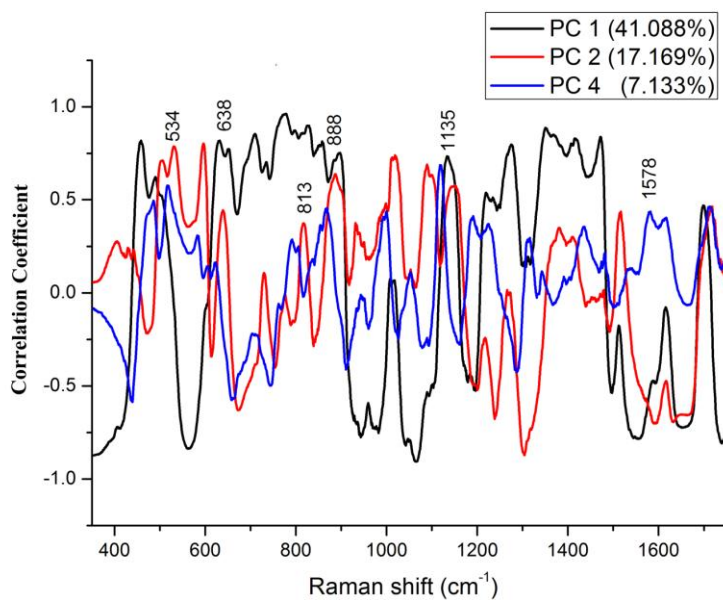

**Fig. S1** The three most diagnostically significant ( $P < 0.05$ ) principal components (PC1, PC2 and PC4) for discriminating cancer plasma from normal plasma. These three PCs accounting for 54.39% of the total variance calculated from all the SERS spectra (PC1, 40.088%; PC2, 17.169%; PC4, 7.133%).
